# Supplementary material
Source: Springer Nature journal article supplement (https://www.springermedizin.de/resource/supplementary/12891_2012_1670_MOESM1_ESM.pdf/9508980)
Supplement: MOESM1 [file 9508980]

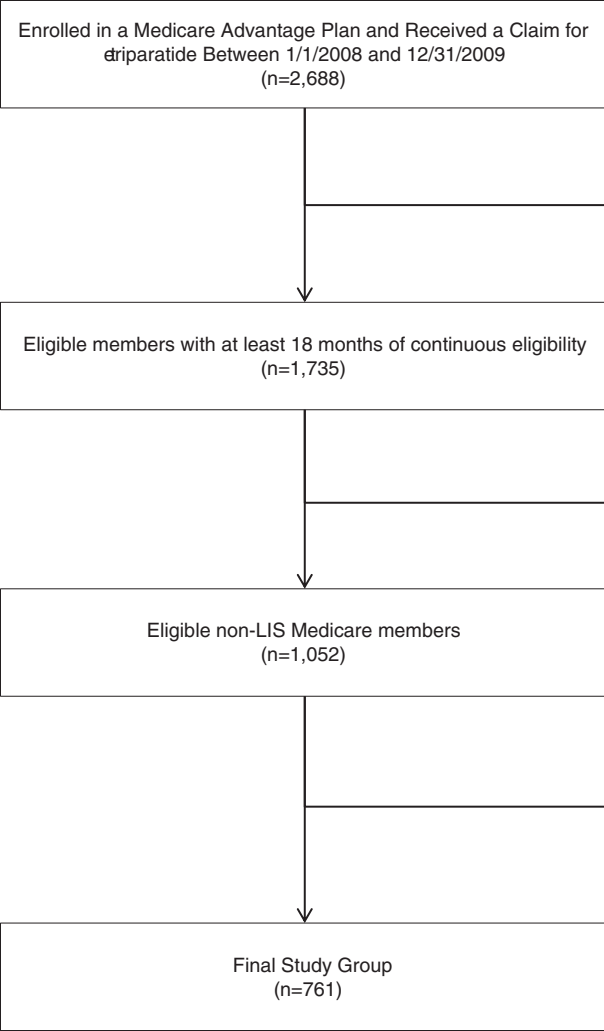

Enrolled in a Medicare Advantage Plan and Received a Claim for teriparatide Between 1/1/2008 and 12/31/2009 (n=2,688)

**Excluded Members:**  
Less Than 6 Months of Continuous Eligibility (Pre-Period) (n=493)  
Less Than 12 Months of Continuous Eligibility (Post-Period) (n=473)  
< 18 or ≥90 Years Old on Index Date (n=112)

Eligible members with at least 18 months of continuous eligibility (n=1,735)

**Excluded Members:**  
Enrolled in a Line of Business\* to be Excluded During the Observation Period (n=212)  
Low Income Subsidy During 18 Month Observation Period (n=560)

Eligible non-LIS Medicare members (n=1,052)

**Excluded Members:**  
Pharmacy Claim for teriparatide in the Pre-Index Period (n= 291)

Final Study Group (n=761)
